# Supplementary material for: PGRS Domain of Rv0297 of Mycobacterium tuberculosis Functions in A Calcium Dependent Manner
Source: MDPI journal article supplement (doi:10.3390/ijms22179390), 2021-08-30
Supplement: s1 [file s1]

## Supplementary Information

PGRS domain of Rv0297 of *Mycobacterium tuberculosis* functions in a calcium dependent manner

Tarina Sharma <sup>1,2,†</sup>, Jasdeep Singh <sup>3,†</sup>, Sonam Grover <sup>3</sup>, Manjunath P. <sup>2,3</sup>, Firdos Firdos <sup>1</sup>, Anwar Alam <sup>2</sup>, Nasreen Z. Ehtesham <sup>2,\*</sup>, and Seyed E. Hasnain <sup>4,5,\*</sup>

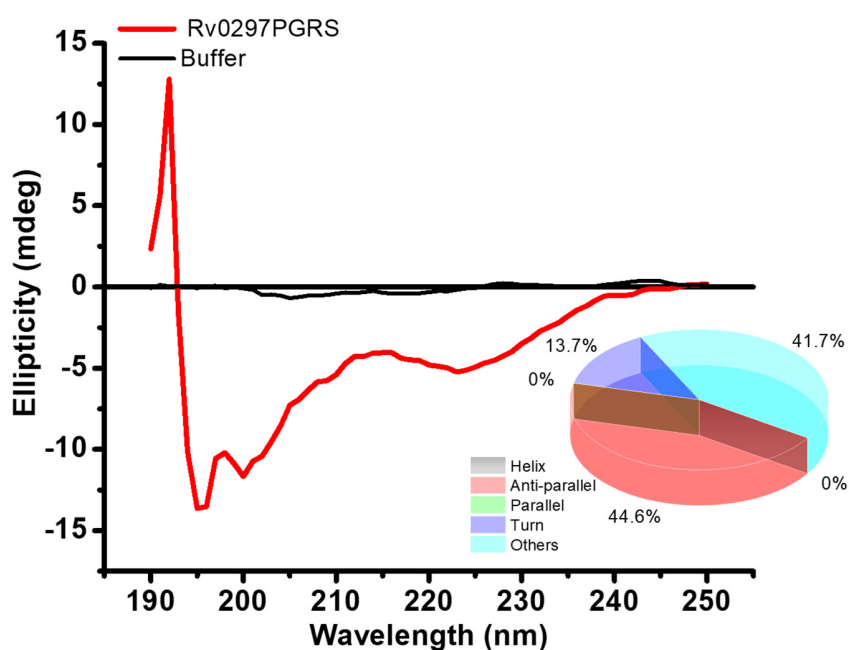

**Supplementary Figure S1.** Circular dichroism spectra of rRv0297PGRS (Red) in phosphate-buffered saline, pH 7.4. Buffer alone spectra is shown in Black. Inset shows secondary structure content estimated using BeStSel module.

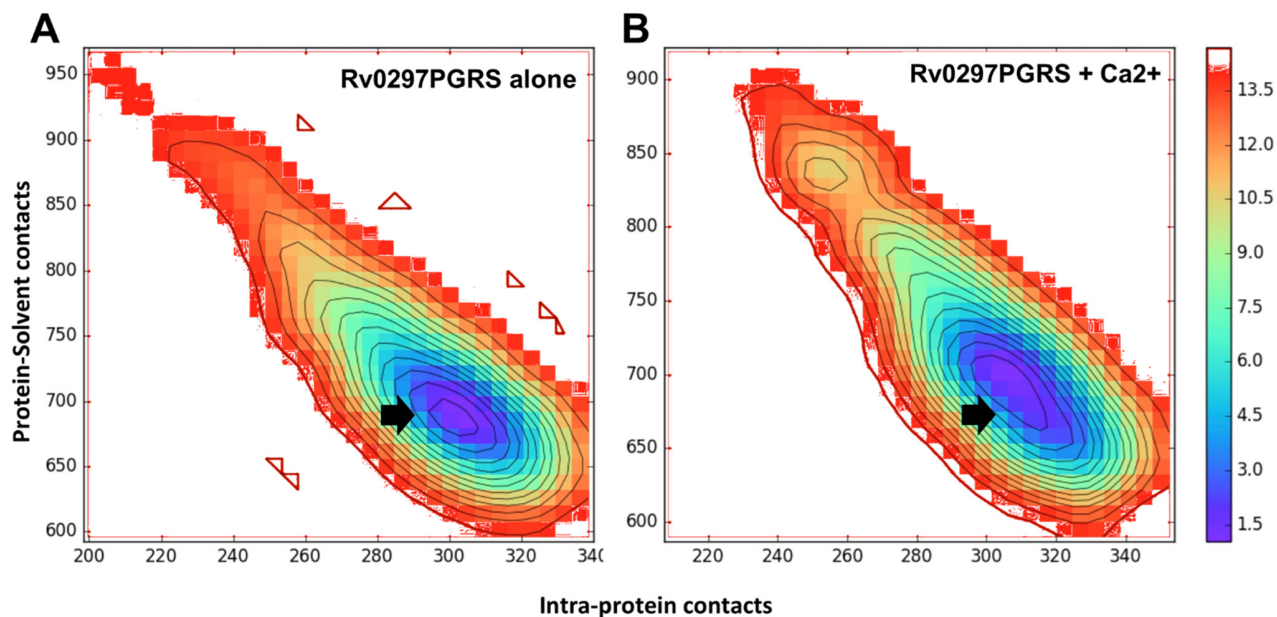

**Supplementary Figure S2.** Free energy landscapes (in kJ/mol) projected using Intra-protein contacts and protein-solvent contacts. The contacts calculated for **(A)** Rv0297PGRS alone and **(B)** Rv0297PGRS+Ca<sup>2+</sup> were averaged over the whole simulation trajectory. Black arrows indicate the lowest free energy basin attained by Rv0297PGRS during respective simulations.

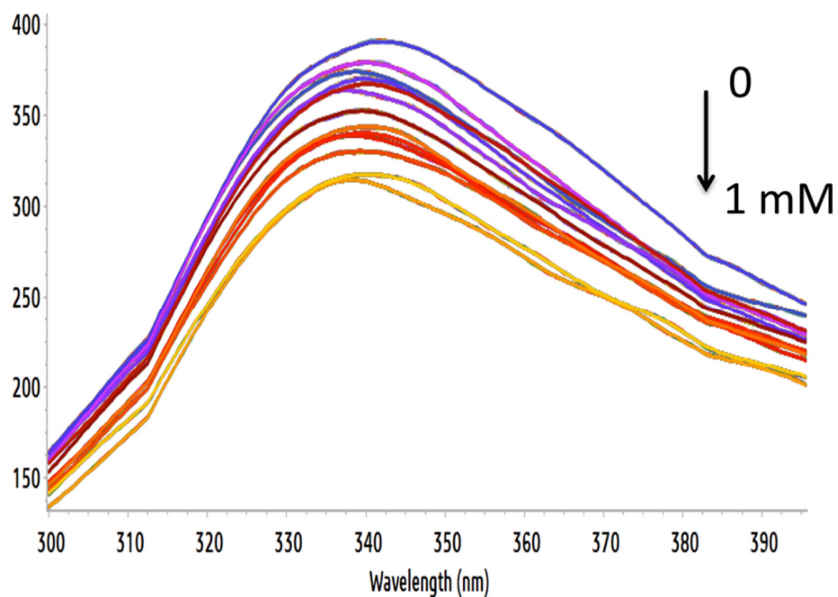

**Supplementary Figure S3. Fluorescence titrations of Rv0297PGRS with Magnesium ions.** Intrinsic fluorescence emission spectra (300-450 nm) of Rv0297PGRS with increasing concentration of  $Mg^{2+}$  in each titration.

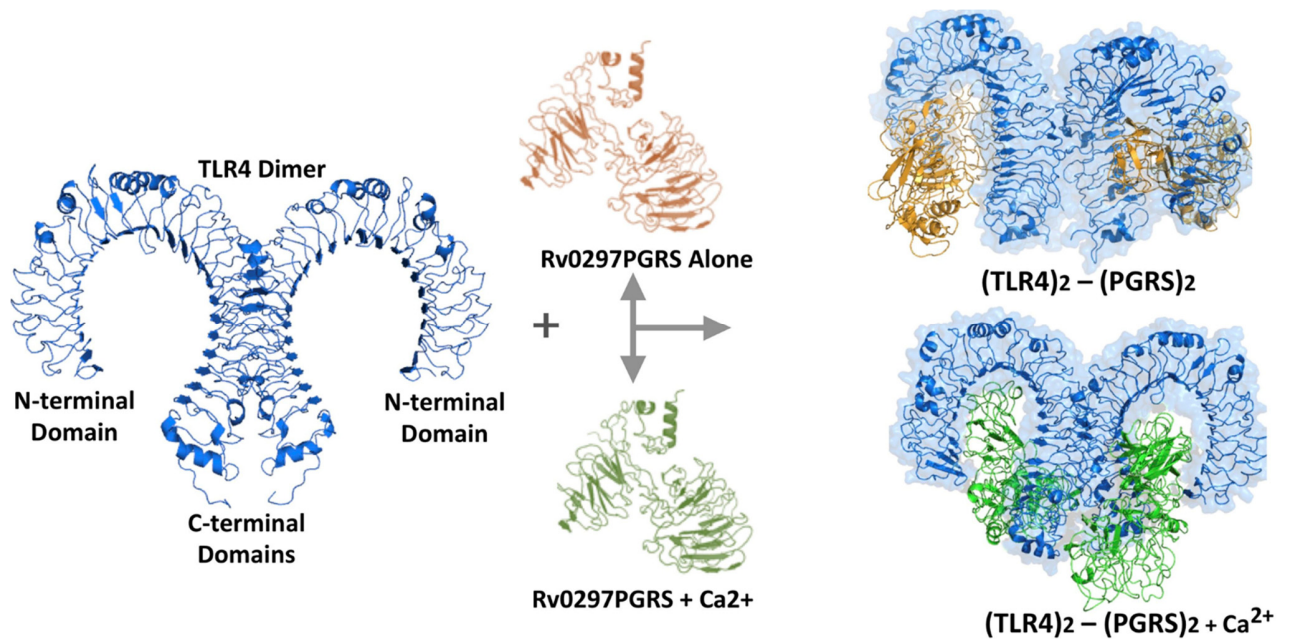

**Supplementary Figure S4. Schematic for dimer docking of Rv0297PGRS with TLR4 dimer.** Protein-protein docking was carried out using ClusPro and subsequently these models were simulated in the absence and presence of  $Ca^{2+}$  ions.

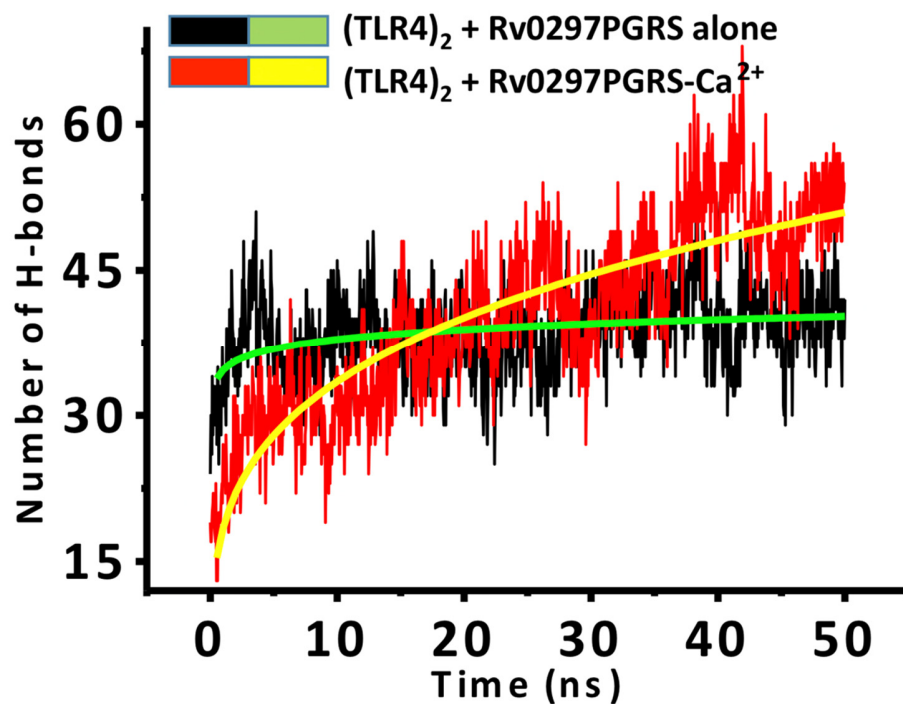

Supplementary Figure S5. H-bond network analysis between Rv0297PGRS and TLR4 dimer. Variations in H-bond number between Rv0297PGRS and TLR4 dimer alone (Black/Green) and in the presence of Ca<sup>2+</sup> ions (Red/Yellow). Yellow and Green curves are shown to mark differences in the average number of H-bonds per time frame for both systems.

**Table S1.** List of predicted calcium-binding motifs in the PGRS domains of various PE\_PGRS proteins of *Mycobacterium tuberculosis*.

| <i>M.tb</i> Rv Number | <i>M.tb</i> protein Product | No. of putative Calcium binding Motifs |
|-----------------------|-----------------------------|----------------------------------------|
| Rv0109                | PE_PGRS_1                   | 4                                      |
| Rv0124                | PE_PGRS_2                   | 7                                      |
| Rv 0278c              | PE_PGRS_3                   | 22                                     |
| Rv0279c               | PE_PGRS_4                   | 15                                     |
| Rv0297                | PE_PGRS_5                   | 15                                     |
| Rv0532                | PE_PGRS_6                   | 7                                      |
| Rv0578c               | PE_PGRS_7                   | 41                                     |
| Rv0742                | PE_PGRS_8                   | 0                                      |
| Rv0746                | PE_PGRS_9                   | 9                                      |
| Rv0747                | PE_PGRS_10                  | 12                                     |
| Rv0754                | PE_PGRS_11                  | 1                                      |
| Rv0832                | PE_PGRS_12                  | 0                                      |
| Rv0833                | PE_PGRS_13                  | 17                                     |
| Rv0834c               | PE_PGRS_14                  | 17                                     |
| Rv0872c               | PE_PGRS_15                  | 9                                      |
| Rv0977                | PE_PGRS_16                  | 18                                     |
| Rv0978c               | PE_PGRS_17                  | 0                                      |
| Rv0980c               | PE_PGRS_18                  | 1                                      |
| Rv1067c               | PE_PGRS_19                  | 16                                     |
| Rv1068c               | PE_PGRS_20                  | 10                                     |
| Rv1087                | PE_PGRS_21                  | 13                                     |
| Rv1091                | PE_PGRS_22                  | 27                                     |
| Rv1243c               | PE_PGRS_23                  | 24                                     |
| Rv1325c               | PE_PGRS_24                  | 9                                      |
| Rv1396c               | PE_PGRS_25                  | 8                                      |
| Rv1441c               | PE_PGRS_26                  | 11                                     |
| Rv1450c               | PE_PGRS_27                  | 44                                     |
| Rv1452c               | PE_PGRS_28                  | 18                                     |
| Rv1468c               | PE_PGRS_29                  | 5                                      |
| Rv1651c               | PE_PGRS_30                  | 12                                     |
| Rv1768                | PE_PGRS_31                  | 13                                     |
| Rv1803c               | PE_PGRS_32                  | 23                                     |
| Rv1818c               | PE_PGRS_33                  | 8                                      |

|         |                    |           |
|---------|--------------------|-----------|
| Rv1840c | PE_PGRS_34         | 10        |
| Rv1983  | PE_PGRS_35         | 1         |
| Rv2162c | PE_PGRS_38         | <b>15</b> |
| Rv2340c | PE_PGRS_39         | 1         |
| Rv2371  | PE_PGRS_40         | 0         |
| Rv2396  | PE_PGRS_41         | 6         |
| Rv2487c | PE_PGRS_42         | 22        |
| Rv2490c | PE_PGRS_43         | 74        |
| Rv2591  | PE_PGRS_44         | 9         |
| Rv2615c | PE_PGRS_45         | 13        |
| Rv2634c | PE_PGRS_46         | 11        |
| Rv2741  | PE_PGRS_47         | 10        |
| Rv2853  | PE_PGRS_48         | 11        |
| Rv3344c | PE_PGRS_49         | 23        |
| Rv3345  | PE_PGRS_50         | 74        |
| Rv3367  | PE_PGRS_51         | 18        |
| Rv3388  | PE_PGRS_52         | 18        |
| Rv3507  | PE_PGRS_53         | 67        |
| Rv3508  | PE_PGRS_54         | 56        |
| Rv3511  | PE_PGRS_55         | 25        |
| Rv3512  | PE_PGRS_56         | 54        |
| Rv3514  | PE_PGRS_57         | 38        |
| Rv3590c | PE_PGRS_58         | 11        |
| Rv3595c | PE_PGRS_59         | 4         |
| Rv3652  | PE_PGRS_60         | 0         |
| Rv3653  | PE_PGRS_61         | 1         |
| Rv3812  | PE_PGRS_62         | 0         |
| Rv3097c | PE_PGRS_63 ; lip Y | 0         |
